# Supplementary material for: Heterogeneity of glycan biomarker clusters as an indicator of recurrence in pancreatic cancer
Source: Front Oncol. 2023 Apr 12;13:1135405. doi: 10.3389/fonc.2023.1135405 (PMC10130372; doi:10.3389/fonc.2023.1135405)
Supplement: Supplementary file 2 [file DataSheet_2.xlsx]

## Sheet: Key
Supplementary Table 2. Receiver-operator characteristic analysis to determine cutoffs.
Each tab gives the marker values and sensitivities, specificities, and average sensitivity+specificity of each marker. The cutoff in outlined in each table.
Table 2A: CA19-9 amounts
Table 2B: STRA amounts
Table 2C: STRA-only clusters
Table 2D: CA199-only clusters
Table 2E: Dual clusters
Cutoffs:
CA19-9 amounts	4.538
STRA amounts	3.4
STRA-only clusters	2.858
CA199-only clusters	3.038
Dual clusters	2.222

## Sheet: 2A. CA19-9 amounts
CA19-9 non-recurrent	CA19-9 recurrent		Cutoff	Specificity%	Sensitivity%	Likelihood ratio	Avg sens spec
7.0022	1.6459		< 0.6863	0	87.5	0	43.75
2.8999	0.77662		< 1.211	7.692	87.5	0.6154	47.596
10.7445	4.2189		< 2.078	15.38	87.5	1.231	51.44
4.8723	3.0204		< 2.705	23.08	87.5	1.846	55.29
0.59606	12.0383		< 2.960	23.08	75	0.9231	49.04
4.8577	5.8722		< 3.119	30.77	75	1.231	52.885
3.2181	6.401		< 3.447	30.77	62.5	0.8205	46.635
8.311	5.7885		< 3.831	38.46	62.5	1.026	50.48
	8.6934		< 4.102	46.15	62.5	1.231	54.325
	3.6763		< 4.538	53.85	62.5	1.436	58.175
	2.5098		< 4.865	53.85	50	1.077	51.925
	8.3578		< 5.330	53.85	37.5	0.8615	45.675
	3.9859		< 5.830	61.54	37.5	0.9846	49.52
			< 6.137	69.23	37.5	1.108	53.365
			< 6.702	76.92	37.5	1.231	57.21
			< 7.657	76.92	25	1.026	50.96
			< 8.334	76.92	12.5	0.8791	44.71
			< 8.526	84.62	12.5	0.967	48.56
			< 9.719	92.31	12.5	1.055	52.405
			< 11.39	92.31	0	0.9231	46.155

## Sheet: 2B. STRA amounts
sTRA non-recurrent	sTRA recurrent		Cutoff	Sensitivity%	Specificity%	Avg sens spec
3.3224	7.3893		> 1.258	92.31	0	46.155
6.1224	5.2262		> 1.525	92.31	12.5	52.405
3.8679	2.6453		> 1.722	84.62	12.5	48.56
3.1884	2.9414		> 2.190	84.62	25	54.81
4.2077	7.9597		> 2.793	76.92	25	50.96
1.3397	5.716		> 3.065	69.23	25	47.115
1.7337	1.7102		> 3.255	69.23	37.5	53.365
5.9319	4.4123		> 3.595	69.23	50	59.615
	7.512		> 4.038	69.23	62.5	65.865
	6.2701		> 4.310	69.23	75	72.115
	5.1486		> 4.780	61.54	75	68.27
	9.7547		> 5.187	53.85	75	64.425
	1.177		> 5.471	46.15	75	60.575
			> 5.824	38.46	75	56.73
			> 6.027	38.46	87.5	62.98
			> 6.196	38.46	100	69.23
			> 6.830	30.77	100	65.385
			> 7.451	23.08	100	61.54
			> 7.736	15.38	100	57.69
			> 8.857	7.692	100	53.846

## Sheet: 2C. STRA-only clusters
STRA-only non-recurrent	STRA-only recurrent		Cutoff	Sensitivity%	Specificity%	Avg sens spec
7.72445	11.4699		> 0.8199	100	12.5	56.25
11.6309	9.6543		> 1.164	100	25	62.5
1.35472	4.58799		> 1.531	100	37.5	68.75
6.64641	10.2632		> 2.145	92.31	37.5	64.905
2.58259	4.17945		> 2.858	92.31	50	71.155
0.973314	1.70648		> 3.202	84.62	50	67.31
0.666483	6.47166		> 3.725	76.92	50	63.46
9.1344	4.53714		> 4.358	69.23	50	59.615
	7.36659		> 4.563	61.54	50	55.77
	3.1332		> 5.530	53.85	50	51.925
	8.51463		> 6.559	46.15	50	48.075
	15.26		> 7.007	46.15	62.5	54.325
	3.2701		> 7.546	38.46	62.5	50.48
			> 8.120	38.46	75	56.73
			> 8.825	30.77	75	52.885
			> 9.394	30.77	87.5	59.135
			> 9.959	23.08	87.5	55.29
			> 10.87	15.38	87.5	51.44
			> 11.55	7.692	87.5	47.596
			> 13.45	7.692	100	53.846

## Sheet: 2D. CA199-only clusters
CA199-only non-recurrent	CA199-only recurrent		Cutoff	Sensitivity%	Specificity%	Avg sens spec
13.1733	2.16478		> 1.587	100	12.5	56.25
2.50565	4.20456		> 2.095	92.31	12.5	52.405
2.48325	6.50517		> 2.324	84.62	12.5	48.56
1.15022	2.02457		> 2.494	84.62	25	54.81
2.51304	7.57415		> 2.509	84.62	37.5	61.06
3.63918	3.56324		> 3.038	84.62	50	67.31
10.308	17.8867		> 3.601	76.92	50	63.46
5.80225	7.18337		> 3.733	76.92	62.5	69.71
	7.11102		> 4.016	69.23	62.5	65.865
	6.44518		> 4.895	61.54	62.5	62.02
	3.82709		> 5.694	53.85	62.5	58.175
	5.58595		> 6.124	53.85	75	64.425
	8.53563		> 6.475	46.15	75	60.575
			> 6.808	38.46	75	56.73
			> 7.147	30.77	75	52.885
			> 7.379	23.08	75	49.04
			> 8.055	15.38	75	45.19
			> 9.422	7.692	75	41.346
			> 11.74	7.692	87.5	47.596
			> 15.53	7.692	100	53.846

## Sheet: 2E. Dual clusters
Dual non-recurent	Dual recurrent		Cutoff	Sensitivity%	Specificity%	Avg sens spec
5.6531	0.318181		> 0.3235	92.31	0	46.155
0.774424	15.2598		> 0.3590	84.62	0	42.31
2.20923	4.89165		> 0.4633	84.62	12.5	48.56
0.537547	1.24567		> 0.5470	84.62	25	54.81
1.75995	5.25797		> 0.6654	84.62	37.5	61.06
0.389084	5.08115		> 1.010	84.62	50	67.31
0.556398	2.80065		> 1.503	76.92	50	63.46
4.0616	2.23529		> 1.798	76.92	62.5	69.71
	4.66542		> 2.023	69.23	62.5	65.865
	0.328908		> 2.222	69.23	75	72.115
	1.83608		> 2.518	61.54	75	68.27
	16.449		> 3.299	53.85	75	64.425
	3.79826		> 3.930	46.15	75	60.575
			> 4.364	46.15	87.5	66.825
			> 4.779	38.46	87.5	62.98
			> 4.986	30.77	87.5	59.135
			> 5.170	23.08	87.5	55.29
			> 5.456	15.38	87.5	51.44
			> 10.46	15.38	100	57.69
			> 15.85	7.692	100	53.846
